# Supplementary material for: Evaluating Metabolite-Based Biomarkers for Early Diagnosis of Pancreatic Cancer: A Systematic Review
Source: MDPI journal article supplement (doi:10.3390/metabo13070872), 2023-07-22
Supplement: s1 [file s1]

## SUPPLEMENTARY MATERIAL

### Evaluating metabolite-based biomarkers for early diagnosis of pancreatic cancer: a systematic review

Table S1. Result from Pathway Analysis.

|                                                     | Total | Expected | Hits | Raw p     | -log10(p) | Holm<br>adjust | FDR       | Impact  |
|-----------------------------------------------------|-------|----------|------|-----------|-----------|----------------|-----------|---------|
| Aminoacyl-tRNA biosynthesis                         | 48    | 1,6413   | 14   | 1,02E-10  | 9,9915    | 8,566E-06      | 8,566E-06 | 0       |
| Arginine biosynthesis                               | 14    | 0,4787   | 6    | 2,93E-06  | 5,5338    | 0,0002428      | 0,0001229 | 0,48223 |
| Alanine, aspartate and glutamate metabolism         | 28    | 0,9574   | 7    | 2,49E-05  | 4,6041    | 0,0020404      | 0,0006967 | 0,3133  |
| Arginine and proline metabolism                     | 38    | 1,2994   | 7    | 0,0002035 | 3,6915    | 0,01648        | 0,0042726 | 0,34441 |
| Citrate cycle (TCA cycle)                           | 20    | 0,6839   | 5    | 0,0004055 | 3.392     | 0,032441       | 0,0068127 | 0,19798 |
| Glyoxylate and dicarboxylate metabolism             | 32    | 1,0942   | 6    | 0,0005486 | 3,2607    | 0,04334        | 0,0076805 | 0,10582 |
| Glycine, serine and threonine metabolism            | 33    | 1,1284   | 6    | 0,000653  | 3,1851    | 0,050937       | 0,0078365 | 0,24577 |
| Glycerophospholipid metabolism                      | 36    | 1.231    | 6    | 0,001061  | 2,9743    | 0,081697       | 0,011141  | 0,21938 |
| Valine, leucine and isoleucine biosynthesis         | 8     | 0,2736   | 3    | 0,0018738 | 2,7273    | 0,14241        | 0,017489  | 0       |
| Sphingolipid metabolism                             | 21    | 0,7181   | 4    | 0,0047373 | 2,3245    | 0,3553         | 0,039793  | 0,28804 |
| Pyruvate metabolism                                 | 22    | 0,7523   | 4    | 0,0056448 | 2,2484    | 0,41771        | 0,043046  | 0,23794 |
| Phenylalanine, tyrosine and tryptophan biosynthesis | 4     | 0,1368   | 2    | 0,0065884 | 2,1812    | 0,48095        | 0,043046  | 1       |
| Propanoate metabolism                               | 23    | 0,7865   | 4    | 0,0066618 | 2,1764    | 0,48095        | 0,043046  | 0,04061 |

|                                                            |    |        |   |          |         |         |          |         |
|------------------------------------------------------------|----|--------|---|----------|---------|---------|----------|---------|
| <b>Glycolysis / Gluconeogenesis</b>                        | 26 | 0,889  | 4 | 0,010423 | 1.982   | 0,74007 | 0,060147 | 0,10065 |
| <b>Linoleic acid metabolism</b>                            | 5  | 0,171  | 2 | 0,010741 | 1.969   | 0,75184 | 0,060147 | 1       |
| <b>Tyrosine metabolism</b>                                 | 42 | 1,4361 | 5 | 0,012547 | 1,9015  | 0,86576 | 0,063038 | 0,30581 |
| <b>Butanoate metabolism</b>                                | 15 | 0,5129 | 3 | 0,012843 | 1,8913  | 0,87332 | 0,063038 | 0       |
| <b>Glutathione metabolism</b>                              | 28 | 0,9574 | 4 | 0,013571 | 1,8674  | 0,90926 | 0,063038 | 0,11548 |
| <b>Histidine metabolism</b>                                | 16 | 0,5471 | 3 | 0,015429 | 1,8117  | 1       | 0,063038 | 0,22131 |
| <b>Nitrogen metabolism</b>                                 | 6  | 0,2052 | 2 | 0,01576  | 1,8025  | 1       | 0,063038 | 0       |
| <b>D-Glutamine and D-glutamate metabolism</b>              | 6  | 0,2052 | 2 | 0,01576  | 1,8025  | 1       | 0,063038 | 0,5     |
| <b>Phenylalanine metabolism</b>                            | 10 | 0,3419 | 2 | 0,043311 | 1,3634  | 1       | 0,16537  | 0,35714 |
| <b>Porphyrin and chlorophyll metabolism</b>                | 30 | 1,0258 | 3 | 0,080023 | 1,0968  | 1       | 0,29226  | 0,02955 |
| <b>Cysteine and methionine metabolism</b>                  | 33 | 1,1284 | 3 | 0,10018  | 0,99921 | 1       | 0,35064  | 0,11254 |
| <b>Biosynthesis of unsaturated fatty acids</b>             | 36 | 1.231  | 3 | 0,12218  | 0,91301 | 1       | 0,41051  | 0       |
| <b>Synthesis and degradation of ketone bodies</b>          | 5  | 0,171  | 1 | 0,15986  | 0,79626 | 1       | 0,50496  | 0       |
| <b>Tryptophan metabolism</b>                               | 41 | 1,4019 | 3 | 0,16231  | 0,78966 | 1       | 0,50496  | 0,32556 |
| <b>Ascorbate and aldarate metabolism</b>                   | 8  | 0,2736 | 1 | 0,24344  | 0,6136  | 1       | 0,73033  | 0       |
| <b>Ubiquinone and other terpenoid-quinone biosynthesis</b> | 9  | 0,3077 | 1 | 0,26945  | 0,56953 | 1       | 0,78046  | 0       |
| <b>Biotin metabolism</b>                                   | 10 | 0,3419 | 1 | 0,29457  | 0,53081 | 1       | 0,8248   | 0       |
| <b>alpha-Linolenic acid metabolism</b>                     | 13 | 0,4445 | 1 | 0,36497  | 0,43774 | 1       | 0,98895  | 0       |
| <b>Pyrimidine metabolism</b>                               | 39 | 1,3335 | 2 | 0,3884   | 0,41072 | 1       | 1        | 0,01584 |
| <b>Primary bile acid biosynthesis</b>                      | 46 | 1,5729 | 2 | 0,47222  | 0,32585 | 1       | 1        | 0,01735 |
| <b>Pantothenate and CoA biosynthesis</b>                   | 19 | 0,6497 | 1 | 0,48572  | 0,31362 | 1       | 1        | 0       |

|                                                   |    |        |   |         |          |   |   |         |
|---------------------------------------------------|----|--------|---|---------|----------|---|---|---------|
| <b>Selenocompound metabolism</b>                  | 20 | 0,6839 | 1 | 0,50352 | 0,29798  | 1 | 1 | 0       |
| <b>Ether lipid metabolism</b>                     | 20 | 0,6839 | 1 | 0,50352 | 0,29798  | 1 | 1 | 0       |
| <b>beta-Alanine metabolism</b>                    | 21 | 0,7181 | 1 | 0,52072 | 0,2834   | 1 | 1 | 0       |
| <b>Lysine degradation</b>                         | 25 | 0,8548 | 1 | 0,58386 | 0,23369  | 1 | 1 | 0       |
| <b>Galactose metabolism</b>                       | 27 | 0,9232 | 1 | 0,61229 | 0,21304  | 1 | 1 | 0       |
| <b>Phosphatidylinositol signaling system</b>      | 28 | 0,9574 | 1 | 0,62578 | 0,20358  | 1 | 1 | 0,03736 |
| <b>Inositol phosphate metabolism</b>              | 30 | 1,0258 | 1 | 0,6514  | 0,18615  | 1 | 1 | 0,12939 |
| <b>Purine metabolism</b>                          | 65 | 2,2226 | 2 | 0,66223 | 0,17899  | 1 | 1 | 0,0054  |
| <b>Arachidonic acid metabolism</b>                | 36 | 1.231  | 1 | 0,71836 | 0,14366  | 1 | 1 | 0       |
| <b>Fatty acid elongation</b>                      | 39 | 1,3335 | 1 | 0,74693 | 0,12672  | 1 | 1 | 0       |
| <b>Fatty acid degradation</b>                     | 39 | 1,3335 | 1 | 0,74693 | 0,12672  | 1 | 1 | 0       |
| <b>Valine, leucine and isoleucine degradation</b> | 40 | 1,3677 | 1 | 0,75581 | 0,12159  | 1 | 1 | 0       |
| <b>Fatty acid biosynthesis</b>                    | 47 | 1,6071 | 1 | 0,80994 | 0,091547 | 1 | 1 | 0,01473 |

The statistical p values from enrichment analysis are further adjusted for multiple testings. In particular, the Total is the total number of compounds in the pathway; the Hits is the actually matched number from the user uploaded data; the Raw p is the original p value calculated from the enrichment analysis; the Holm p is the p value adjusted by Holm-Bonferroni method; the FDR p is the p value adjusted using False Discovery Rate; the Impact is the pathway impact value calculated from pathway topology analysis.
